# Supplementary material for: Carotenoids and Vitamin A in Breastmilk of Hong Kong Lactating Mothers and Their Relationships with Maternal Diet
Source: MDPI journal article supplement (doi:10.3390/nu14102031), 2022-05-12
Supplement: s1 [file s1]

**Supplementary Table S1. Daily intake of carotenoid from the most frequently consumed dark green vegetables, light-colored vegetables, red and orange vegetables, and fruits.**

| Food group               | Food item             | Carotenoid content (µg/100g) |            |          | Mean carotenoid consumption (µg/day) <sup>1</sup> |            |          |
|--------------------------|-----------------------|------------------------------|------------|----------|---------------------------------------------------|------------|----------|
|                          |                       | Lutein                       | β-Carotene | Lycopene | Lutein                                            | β-Carotene | Lycopene |
| Dark green vegetable     | Choy sum              | 2848.1                       | 2012.9     | 0.0      | 599.3                                             | 423.6      | 0.0      |
|                          | Broccoli              | 1080.0                       | 929.0      | 0.0      | 84.8                                              | 73.0       | 0.0      |
|                          | Chinese kale          | 912.0                        | 983.0      | 0.0      | 34.6                                              | 37.3       | 0.0      |
|                          | Spinach               | 11308.0                      | 6288.0     | 0.0      | 140.8                                             | 78.3       | 0.0      |
|                          | Water spinach         | 8928.5                       | 5539.0     | 0.0      | 465.2                                             | 288.6      | 0.0      |
| Light-colored vegetable  | Chinese white cabbage | 1254.5                       | 30.0       | 0.0      | 66.8                                              | 1.6        | 0.0      |
|                          | Celery                | 329.0                        | 313.0      | 0.0      | 4.9                                               | 4.6        | 0.0      |
|                          | Shredded cabbage      | 30.0                         | 42.0       | 0.0      | 1.5                                               | 2.1        | 0.0      |
|                          | Baby Chinese cabbage  | 1254.5                       | 202.6      | 0.0      | 10.1                                              | 1.6        | 0.0      |
|                          | Cauliflower           | 29.0                         | 7.0        | 0.0      | 0.3                                               | 0.1        | 0.0      |
| Red and orange vegetable | Tomato                | 94.0                         | 293.0      | 3041.0   | 11.0                                              | 34.3       | 355.4    |
|                          | Carrot                | 687.0                        | 8332.0     | 0.0      | 40.4                                              | 489.7      | 0.0      |
|                          | Red pepper            | 47.0                         | 1525.0     | 0.0      | 0.3                                               | 9.9        | 0.0      |
|                          | Pumpkin               | 1014.0                       | 2096.0     | 0.0      | 22.2                                              | 45.9       | 0.0      |
|                          | Sweet potato          | 0.0                          | 11509.0    | 0.0      | 0.0                                               | 273.4      | 0.0      |
| Fruit                    | Orange                | 129.0                        | 87.0       | 0.0      | 19.7                                              | 13.3       | 0.0      |
|                          | Apple                 | 29.0                         | 27.0       | 0.0      | 3.7                                               | 3.4        | 0.0      |
|                          | Banana                | 22.0                         | 26.0       | 0.0      | 1.6                                               | 1.9        | 0.0      |
|                          | Pear                  | 44.0                         | 14.0       | 0.0      | 1.3                                               | 0.4        | 0.0      |
|                          | Pineapple             | 0.0                          | 35.0       | 0.0      | 0.0                                               | 0.7        | 0.0      |

<sup>1</sup>Mean carotenoid consumption refers to the daily intake of carotenoid from a specific food item by the participants ( $n = 87$ ) on average.

**Supplementary Table S2. Regression coefficients on the association between dark leafy vegetable intake and the levels of breastmilk carotenoids and retinol among the 62 participants without supplement intake.**

| Breastmilk retinol and carotenoids | Categories in carotenoid intake | Model 1 (95% C.I.) <sup>I</sup>     | Model 2 (95% C.I.) <sup>I</sup> | Model 3 (95% C.I.) <sup>I</sup> |
|------------------------------------|---------------------------------|-------------------------------------|---------------------------------|---------------------------------|
| Retinol                            | T3                              | 268.9 (80.5, 457.3)** <sup>II</sup> | 280.2 (89.5, 470.9)**           | 275.6 (82.2, 469.1)**           |
|                                    | T2                              | 144.0 (-44.4, 332.4)                | 144.3 (-49.2, 337.8)            | 155.8 (-42.0, 353.7)            |
|                                    | T1                              | Ref                                 | Ref                             | Ref                             |
| Lutein                             | T3                              | 56.2 (26.9, 85.5)***                | 56.2 (27.1, 85.3)***            | 54.3 (25.6, 83.1)***            |
|                                    | T2                              | 40.4 (11.1, 69.7)**                 | 36.2 (6.7, 65.7)*               | 39.1 (9.8, 68.5)*               |
|                                    | T1                              | Ref                                 | Ref                             | Ref                             |
| β-Carotene                         | T3                              | 95.4 (55.1, 135.7)***               | 95.1 (56.9, 133.3)***           | 92.5 (55.2, 129.8)***           |
|                                    | T2                              | 56.3 (16.0, 96.6)**                 | 47.3 (8.5, 86.1)*               | 52.6 (14.5, 90.8)*              |
|                                    | T1                              | Ref                                 | Ref                             | Ref                             |
| Lycopene                           | T3                              | 21.4 (-39.9, 82.8)                  | 21.3 (-38.1, 80.6)              | 20.5 (-40.1, 81.1)              |
|                                    | T2                              | 4.1 (-57.2, 65.5)                   | -11.4 (-71.7, 48.8)             | -11.0 (-72.9, 51.0)             |
|                                    | T1                              | Ref                                 | Ref                             | Ref                             |

<sup>I</sup>Model 1: Univariable analysis; Model 2: Multivariable analysis adjusted for maternal age, BMI, education, and lactation stage; Model 3: Multivariable analysis adjusted for maternal age, BMI, education, lactation stage, fat, and vitamin A intake; <sup>II</sup>\*  $p < 0.05$ , \*\*  $p < 0.01$ .

**Supplementary Table S3. Regression coefficients on the association between red and orange vegetable intake and the levels of breastmilk carotenoids among the 62 participants without supplement intake.**

| Breastmilk retinol and carotenoids | Categories in carotenoid intake | Model 1 (95% C.I.) <sup>I</sup> | Model 2 (95% C.I.) <sup>I</sup> | Model 3 (95% C.I.) <sup>I</sup> |
|------------------------------------|---------------------------------|---------------------------------|---------------------------------|---------------------------------|
| Retinol                            | T3                              | -63.7 (-257.8, 130.3)           | -51.9 (-254.7, 150.8)           | -48.9 (-254.3, 156.5)           |
|                                    | T2                              | 131.8 (-62.2, 325.9)            | 158.4 (-59.0, 375.7)            | 177.3 (-43.2, 397.8)            |
|                                    | T1                              | Ref                             | Ref                             | Ref                             |
| Lutein                             | T3                              | 34.3 (2.7, 65.8)* <sup>II</sup> | 28.5 (-3.8, 60.7)               | 29.0 (-3.2, 61.3)               |
|                                    | T2                              | 6.2 (-25.3, 37.7)               | -5.5 (-40.1, 29.1)              | -1.4 (-36.0, 33.3)              |
|                                    | T1                              | Ref                             | Ref                             | Ref                             |
| $\beta$ -Carotene                  | T3                              | 13.3 (-33.9, 60.4)              | -1.3 (-48.1, 45.6)              | 0.3 (-46.2, 46.7)               |
|                                    | T2                              | -4.1 (-51.2, 43.1)              | -19.2 (-69.5, 31.0)             | -12.3 (-62.2, 37.5)             |
|                                    | T1                              | Ref                             | Ref                             | Ref                             |
| Lycopene                           | T3                              | 27.3 (-33.8, 88.5)              | 17.3 (-43.8, 78.4)              | 17.2 (-45.5, 79.9)              |
|                                    | T2                              | 23.6 (-37.5, 84.8)              | -9.3 (-74.8, 56.2)              | -7.4 (-74.7, 59.9)              |
|                                    | T1                              | Ref                             | Ref                             | Ref                             |

<sup>I</sup>Model 1: Univariable analysis; Model 2: Multivariable analysis adjusted for maternal age, BMI, education, and lactation stage; Model 3: Multivariable analysis adjusted for maternal age, BMI, education, lactation stage, fat, and vitamin A intake; <sup>II</sup>\*  $p < 0.05$ , \*\*  $p < 0.01$ .

**Supplementary Table S4. Regression coefficients on the association between light leafy vegetable intake and the levels of breastmilk carotenoids among the 62 participants without supplement intake.**

| Breastmilk retinol and carotenoids | Categories in carotenoid intake | Model 1 (95% C.I.) <sup>I</sup> | Model 2 (95% C.I.) <sup>I</sup> | Model 3 (95% C.I.) <sup>I</sup> |
|------------------------------------|---------------------------------|---------------------------------|---------------------------------|---------------------------------|
| Retinol                            | T3                              | 158.9 (-37.8, 355.5)            | 147.6 (-60.0, 355.1)            | 139.8 (-71.5, 351.1)            |
|                                    | T2                              | 100.8 (-95.8, 297.4)            | 99.3 (-103.3, 302.0)            | 93.2 (-119.7, 306.0)            |
|                                    | T1                              | Ref                             | Ref                             | Ref                             |
| Lutein                             | T3                              | 33.2 (1.5, 64.9)* <sup>II</sup> | 43.5 (11.7, 75.2)**             | 40.9 (9.2, 72.6)*               |
|                                    | T2                              | 23.5 (-8.2, 55.2)               | 26.0 (-5.0, 57.0)               | 21.1 (-10.8, 53.1)              |
|                                    | T1                              | Ref                             | Ref                             | Ref                             |
| $\beta$ -Carotene                  | T3                              | -19.1 (-65.8, 27.7)             | -6.5 (-53.7, 40.7)              | -11.1 (-57.6, 35.4)             |
|                                    | T2                              | 10.3 (-36.4, 57.1)              | 12.9 (-33.2, 59.0)              | 7.1 (-39.7, 53.9)               |
|                                    | T1                              | Ref                             | Ref                             | Ref                             |
| Lycopene                           | T3                              | -23.4 (-84.3, 37.6)             | -20.1 (-81.5, 41.4)             | -22.1 (-84.7, 40.5)             |
|                                    | T2                              | -34.5 (-95.5, 26.5)             | -26.9 (-86.8, 33.1)             | -32.6 (-95.6, 30.5)             |
|                                    | T1                              | Ref                             | Ref                             | Ref                             |

<sup>I</sup>Model 1: Univariable analysis; Model 2: Multivariable analysis adjusted for maternal age, BMI, education, and lactation stage; Model 3: Multivariable analysis adjusted for maternal age, BMI, education, lactation stage, fat, and vitamin A intake; <sup>II</sup>\*  $p < 0.05$ , \*\*  $p < 0.01$ .

**Supplementary Table S5. Daily intake of retinol from the most frequently consumed food items rich in retinol.**

| Food group    | Food item | Retinol content (µg/100g) | Mean retinol intake (µg/day) <sup>1</sup> |
|---------------|-----------|---------------------------|-------------------------------------------|
| Egg           | Egg       | 148.0                     | 45.5                                      |
| Seafood       | Salmon    | 69.0                      | 2.8                                       |
|               | Mackerel  | 54.0                      | 2.8                                       |
|               | Tuna      | 17.0                      | 0.3                                       |
|               | Prawn     | 90.0                      | 4.7                                       |
| Dairy product | Cheese    | 196.0                     | 1.0                                       |
|               | Butter    | 671.0                     | 33.4                                      |

<sup>1</sup>Mean retinol intake refers to the daily intake of retinol from a specific food item by the participants (*n* = 87) on average.
